# Supplementary material for: Assessment of Risk Factors and Clinical Importance of Enlarged Perivascular Spaces by Whole-Brain Investigation in the Multi-Ethnic Study of Atherosclerosis
Source: PubMed Central journal article supplement (PMC10126873; doi:10.1001/jamanetworkopen.2023.9196), 2023-04-24
Supplement: jamanetwopen-e239196-s002.pdf [file jamanetwopen-e239196-s002.pdf]

## Data Sharing Statement

Charisis. Assessment of Risk Factors and Clinical Importance of Enlarged Perivascular Spaces by Whole-Brain Investigation in the Multi-Ethnic Study of Atherosclerosis. *JAMA Netw Open*. Published April 24, 2023. doi:10.1001/jamanetworkopen.2023.9196

### Data

**Data available:** No

### Additional Information

**Explanation for why data not available:** The data that support the findings of this study are available from the corresponding author (Mohamad Habes), upon reasonable request. Request can be sent to: Mohamad Habes, PhD 7703 Floyd Curl Drive San Antonio TX 78229 Email: [habes@uthscsa.edu](mailto:habes@uthscsa.edu) Phone: +1 210-450-8416
